# Supplementary material for: Atomic layer deposition of germanium-doped zinc oxide films with tuneable ultraviolet emission
Source: Royal Society of Chemistry journal article supplement (doi:10.1039/c2jm31391j), 2012-01-01
Supplement: c2jm31391j.pdf [file c2jm31391j.pdf]

## Supplementary Information

### Atomic layer deposition of germanium – doped zinc oxide films with tuneable ultraviolet emission

Paul R. Chalker, Paul A. Marshall, Peter J. King, Karl Dawson, Simon Romani, Paul A. Williams, John Ridealgh and Matthew J. Rosseinsky

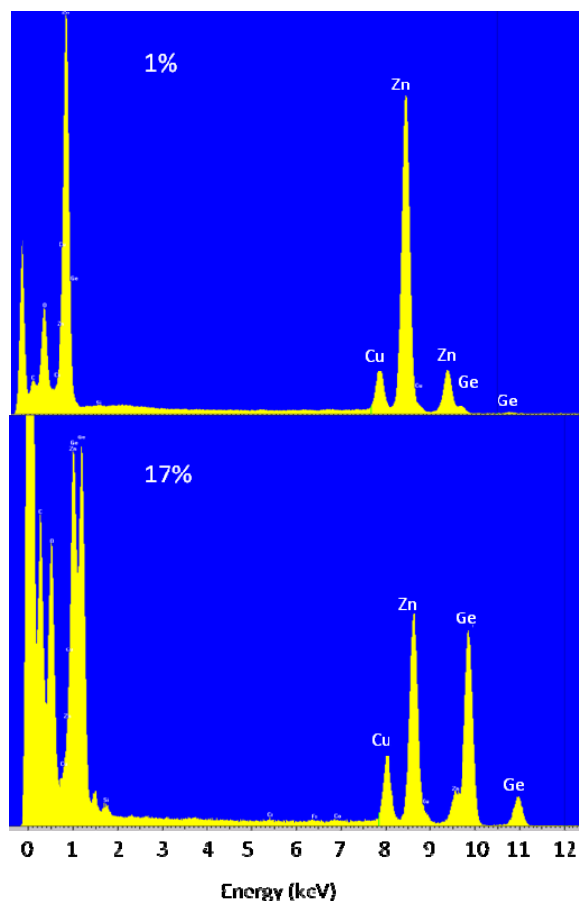

Figure S1. Energy dispersive X-ray spectra recorded at 300KV in the TEM of 1% Ge-doped ZnO and 17% Ge-doped ZnO films grown as-grown at 250°C.

The error in measuring the Ge:Zn ratio is less than 5%. The estimation of the relative Ge incorporation is of the same order of magnitude.

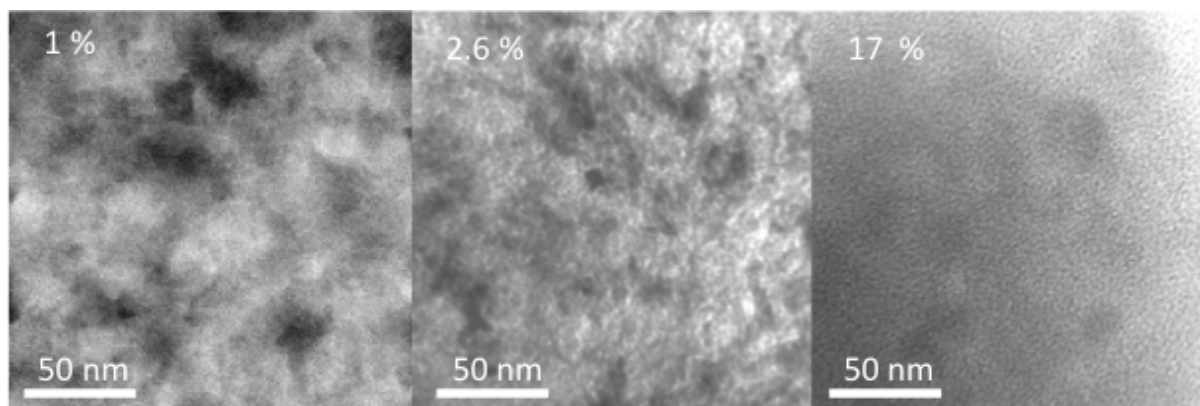

Figure S2. Bright field TEM images of 1%, 2.6% and 17% Ge-doped ZnO films

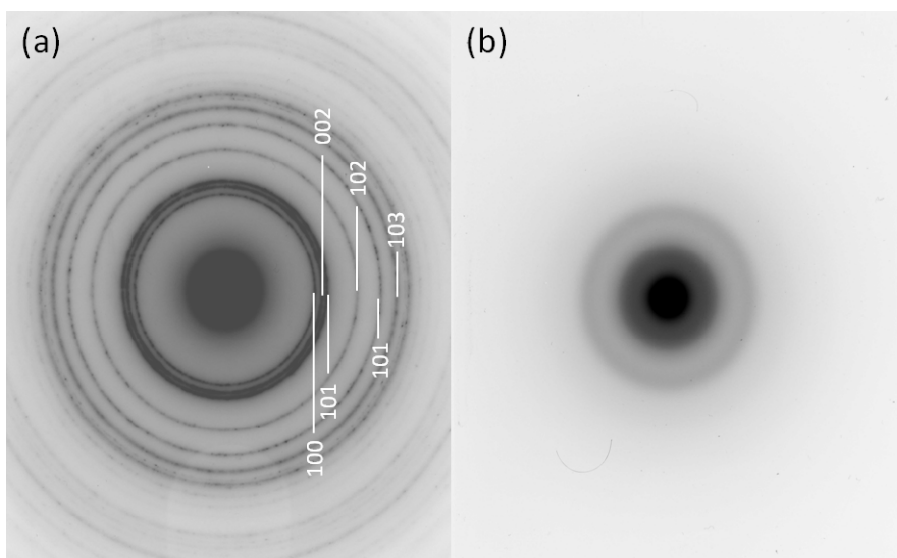

Figure S3. Selected area X-ray diffraction pattern recorded at 300KV in the TEM of: (a) 1% Ge-doped ZnO; (b) of the 17% Ge-doped ZnO film grown as-grown at 250°C

Figure S3 shows selected area X-ray diffraction patterns from (a) 1% Ge-doped ZnO; (b) of the 17% Ge-doped ZnO film grown as-grown at 250°C. The pattern indexing of (a) is consistent with hexagonal ZnO. Figure (b) shows that the 17% Ge-doped ZnO film is effectively amorphous. No germanium oxide diffraction features are evident in either of the 1% or 17% Ge-doped films.

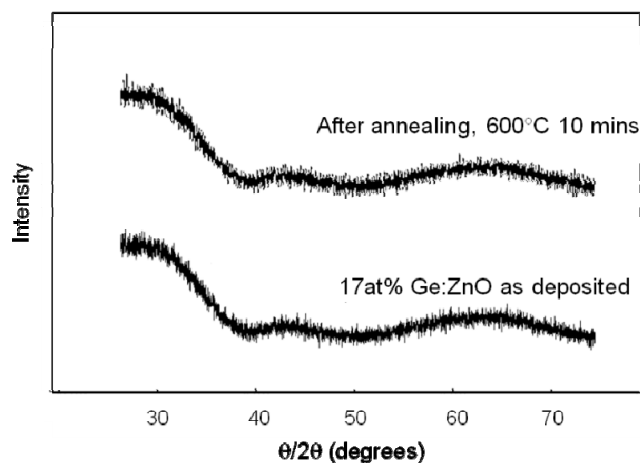

Figure S4. X-ray diffraction pattern of the 17% Ge-doped ZnO film grown as-grown at 250°C and after annealing.

Figure S4 indicates the continuing amorphous character of the 17% Ge-doped ZnO film after annealing at 600°C in air for 10 minutes. The as-deposited film pattern is effectively amorphous and devoid of diffraction features and is unchanged by annealing.

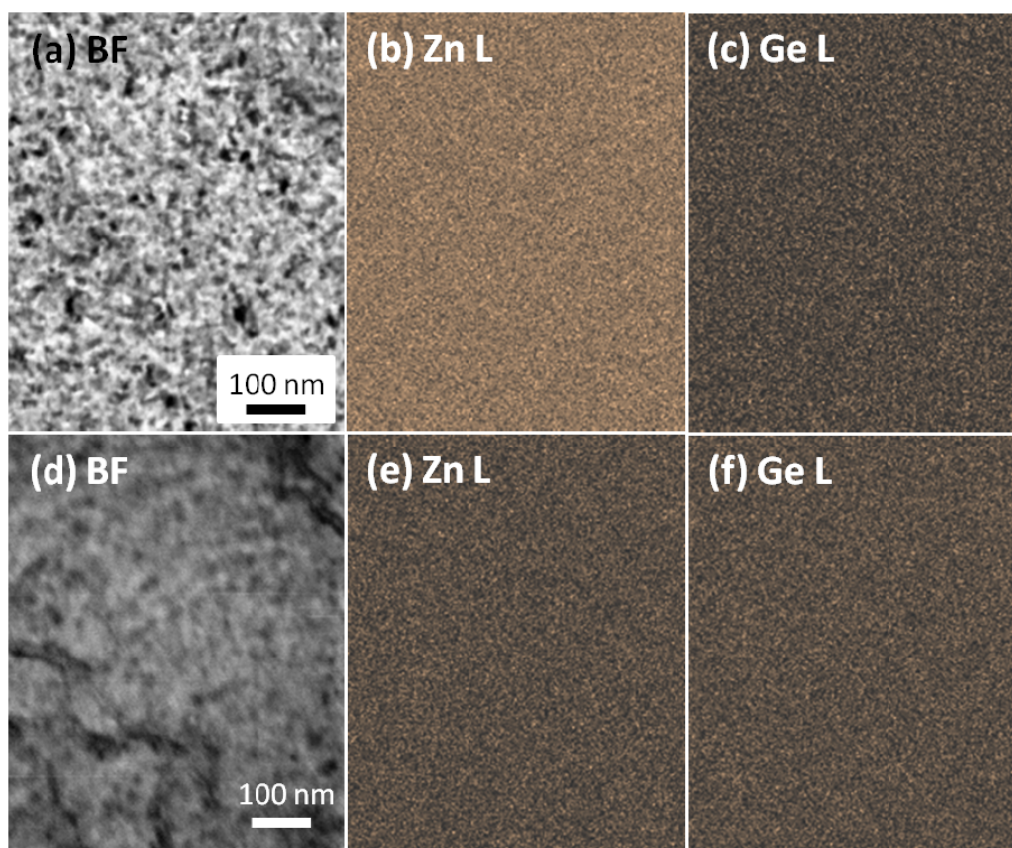

Figure S5. Bright field image and Energy dispersive X-ray maps recorded at 300KV in the TEM of: (a-c) 1% Ge-doped ZnO; (d-f) of the 17% Ge-doped ZnO films grown as-grown at 250°C. Magnification x 100,000 times.

The distributions of Zn and Ge are compared in Figure S4. The energy dispersive X-ray maps illustrate the uniform distributions of the elements and the absence of any segregation.

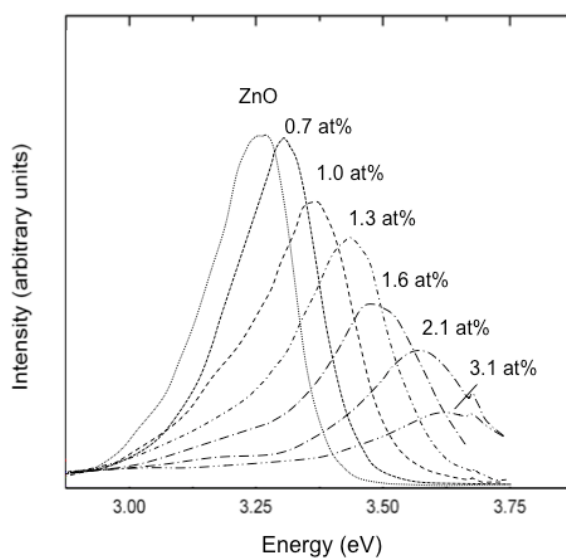

Figure S6. Absolute PL spectra of ZnO:Ge films with varying Ge doping levels deposited at 250°C.
